# Supplementary material
Source: MDPI journal article supplement (https://www.mdpi.com/2218-273X/11/5/684)
Supplement: s1 [file s1]

Archive with 1 entries (1 files):
- biomolecules-1179797 re 1 supple.pdf
